# Supplementary material for: Microaerobic conditions caused the overwhelming dominance of Acinetobacter spp. and the marginalization of Rhodococcus spp. in diesel fuel/crude oil mixture-amended enrichment cultures
Source: PubMed Central journal article supplement (PMC7012980; doi:10.1007/s00203-019-01749-2), 2019-10-29
Supplement: 203_2019_1749_MOESM2_ESM.pdf [file 203_2019_1749_MOESM2_ESM.pdf]

**Microaerobic conditions caused the overwhelming dominance of *Acinetobacter* spp. and the marginalization of *Rhodococcus* spp. in diesel fuel/crude oil mixture amended enrichment cultures**

Fruzsina Révész<sup>1,2</sup>, Perla Abigail Figueroa-Gonzalez<sup>3</sup>, Alexander J. Probst<sup>3</sup>, Balázs Kriszt<sup>1,2</sup>, Sinchan Banerjee<sup>1</sup>, Sándor Szoboszlay<sup>2</sup>, Gergely Maróti<sup>4</sup>, András Táncsics<sup>1,2,\*</sup>

<sup>1</sup>Regional University Center of Excellence in Environmental Industry, Szent István University, Gödöllő, Hungary

<sup>2</sup>Department of Environmental Safety and Ecotoxicology, Szent István University, Gödöllő, Hungary

<sup>3</sup>Biofilm Centre, University of Duisburg-Essen, 45141, Essen, Germany

<sup>4</sup>Institute of Plant Biology, Biological, Research Centre of the Hungarian Academy of Sciences, Szeged, Hungary

**Journal: Archives of Microbiology**

\*Corresponding author: András Táncsics, Szent István University, Páter K. u. 1., 2100 Gödöllő, Hungary, [tancsics.andras@fh.szie.hu](mailto:tancsics.andras@fh.szie.hu), tel.: 06 28 522 000 #1611

**(a)**

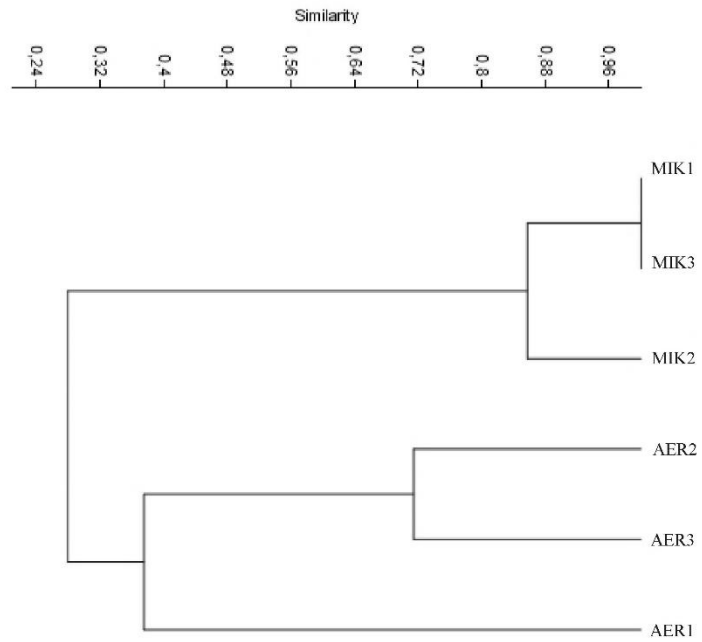

**(b)**

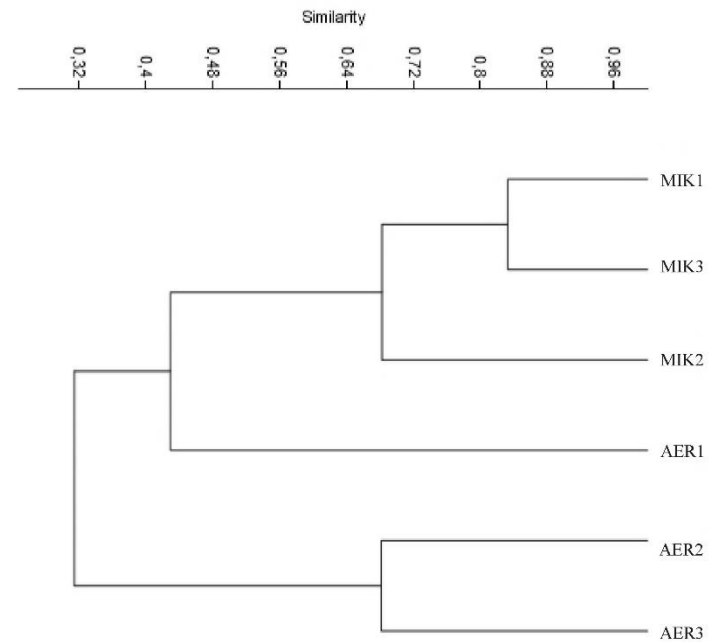

Supplementary Figure 2: Cluster analysis of the *alkB*-based T-RFLP electropherograms by (a) Jaccard and, (b) Bray-Curtis algorithm.
